# Supplementary material for: Borax induces osteogenesis by stimulating NaBC1 transporter via activation of BMP pathway
Source: PubMed Central journal article supplement (PMC7695834; doi:10.1038/s42003-020-01449-4), 2020-11-27
Supplement: 42003_2020_1449_MOESM3_ESM.pdf [file 42003_2020_1449_MOESM3_ESM.pdf]

## Reporting Summary

Nature Research wishes to improve the reproducibility of the work that we publish. This form provides structure for consistency and transparency in reporting. For further information on Nature Research policies, see our [Editorial Policies](#) and the [Editorial Policy Checklist](#).

### Statistics

For all statistical analyses, confirm that the following items are present in the figure legend, table legend, main text, or Methods section.

n/a Confirmed

- |                                     |                                     |                                                                                                                                                                                                                                                            |
|-------------------------------------|-------------------------------------|------------------------------------------------------------------------------------------------------------------------------------------------------------------------------------------------------------------------------------------------------------|
| <input type="checkbox"/>            | <input checked="" type="checkbox"/> | The exact sample size ( $n$ ) for each experimental group/condition, given as a discrete number and unit of measurement                                                                                                                                    |
| <input type="checkbox"/>            | <input checked="" type="checkbox"/> | A statement on whether measurements were taken from distinct samples or whether the same sample was measured repeatedly                                                                                                                                    |
| <input type="checkbox"/>            | <input checked="" type="checkbox"/> | The statistical test(s) used AND whether they are one- or two-sided<br><i>Only common tests should be described solely by name; describe more complex techniques in the Methods section.</i>                                                               |
| <input checked="" type="checkbox"/> | <input type="checkbox"/>            | A description of all covariates tested                                                                                                                                                                                                                     |
| <input type="checkbox"/>            | <input checked="" type="checkbox"/> | A description of any assumptions or corrections, such as tests of normality and adjustment for multiple comparisons                                                                                                                                        |
| <input type="checkbox"/>            | <input checked="" type="checkbox"/> | A full description of the statistical parameters including central tendency (e.g. means) or other basic estimates (e.g. regression coefficient) AND variation (e.g. standard deviation) or associated estimates of uncertainty (e.g. confidence intervals) |
| <input type="checkbox"/>            | <input checked="" type="checkbox"/> | For null hypothesis testing, the test statistic (e.g. $F$ , $t$ , $r$ ) with confidence intervals, effect sizes, degrees of freedom and $P$ value noted<br><i>Give <math>P</math> values as exact values whenever suitable.</i>                            |
| <input checked="" type="checkbox"/> | <input type="checkbox"/>            | For Bayesian analysis, information on the choice of priors and Markov chain Monte Carlo settings                                                                                                                                                           |
| <input checked="" type="checkbox"/> | <input type="checkbox"/>            | For hierarchical and complex designs, identification of the appropriate level for tests and full reporting of outcomes                                                                                                                                     |
| <input checked="" type="checkbox"/> | <input type="checkbox"/>            | Estimates of effect sizes (e.g. Cohen's $d$ , Pearson's $r$ ), indicating how they were calculated                                                                                                                                                         |

*Our web collection on [statistics for biologists](#) contains articles on many of the points above.*

### Software and code

Policy information about [availability of computer code](#)

Data collection

Data analysis

For manuscripts utilizing custom algorithms or software that are central to the research but not yet described in published literature, software must be made available to editors and reviewers. We strongly encourage code deposition in a community repository (e.g. GitHub). See the Nature Research [guidelines for submitting code & software](#) for further information.

### Data

Policy information about [availability of data](#)

All manuscripts must include a [data availability statement](#). This statement should provide the following information, where applicable:

- Accession codes, unique identifiers, or web links for publicly available datasets
- A list of figures that have associated raw data
- A description of any restrictions on data availability

### Field-specific reporting

## Life sciences study design

All studies must disclose on these points even when the disclosure is negative.

|                 |                                                                                                                                                            |
|-----------------|------------------------------------------------------------------------------------------------------------------------------------------------------------|
| Sample size     | n >= 3 for all samples, detailed in each figure caption of the manuscript                                                                                  |
| Data exclusions | No data exclusions                                                                                                                                         |
| Replication     | All experiments were done at least in triplicate, in qPCR we used 3, 6 or 9 biological replicates                                                          |
| Randomization   | Not relevant to our study                                                                                                                                  |
| Blinding        | Data processing was realized assigning a random number for each sample, and the researcher doing the analysis was not aware of the identity of the sample. |

## Reporting for specific materials, systems and methods

We require information from authors about some types of materials, experimental systems and methods used in many studies. Here, indicate whether each material, system or method listed is relevant to your study. If you are not sure if a list item applies to your research, read the appropriate section before selecting a response.

### Materials & experimental systems

| n/a                                 | Involvement in the study                                  |
|-------------------------------------|-----------------------------------------------------------|
| <input type="checkbox"/>            | <input checked="" type="checkbox"/> Antibodies            |
| <input type="checkbox"/>            | <input checked="" type="checkbox"/> Eukaryotic cell lines |
| <input checked="" type="checkbox"/> | <input type="checkbox"/> Palaeontology and archaeology    |
| <input checked="" type="checkbox"/> | <input type="checkbox"/> Animals and other organisms      |
| <input checked="" type="checkbox"/> | <input type="checkbox"/> Human research participants      |
| <input checked="" type="checkbox"/> | <input type="checkbox"/> Clinical data                    |
| <input checked="" type="checkbox"/> | <input type="checkbox"/> Dual use research of concern     |

### Methods

| n/a                                 | Involvement in the study                        |
|-------------------------------------|-------------------------------------------------|
| <input checked="" type="checkbox"/> | <input type="checkbox"/> ChIP-seq               |
| <input checked="" type="checkbox"/> | <input type="checkbox"/> Flow cytometry         |
| <input checked="" type="checkbox"/> | <input type="checkbox"/> MRI-based neuroimaging |

## Antibodies

### Antibodies used

Vinculin: mouse monoclonal, Sigma-Aldrich V9131, clone hVIN1  
 pMLC: mouse monoclonal, Cell Signaling 3675S  
 Integrin a5: rabbit monoclonal, Abcam ab150361, clone EPR7854  
 Integrin av: rabbit monoclonal, Abcam ab179475, clone EPR16800  
 Smad/pSmad1: rabbit monoclonal, Cell Signaling 12656  
 active YAP: rabbit monoclonal, Abcam ab205270, clone EPR19812  
 Runx2: mouse monoclonal, Abcam ab76956  
 FAK: anti rabbit, Millipore 06-543  
 pFAK: anti mouse, Millipore 05-1140  
 Osteopontin: mouse monoclonal, Santa Cruz Biotechnology sc-21742, clone AKm2A1  
 Osteocalcin: mouse monoclonal, Abcam ab13421, clone OCG4  
 Integrin binding sialoprotein: mouse monoclonal, Santa Cruz Biotechnology sc-73634, clone LMFb-24  
 Collagen I: mouse monoclonal, Abcam ab6308, clone COL-1  
 BMPR1A: rabbit polyclonal, Abcam ab38560,  
 NaBC1: goat polyclonal, Abcam ab99459  
 Runx2: anti mouse, Stratech ALS13287  
 pRunx2: anti rabbit, 2B Scientific ARG54883  
 ERK: anti rabbit, Cell Signaling 4685  
 pERK: anti rabbit, Cell Signaling 4370  
 Akt/pAkt: rabbit polyclonal, Thermofisher PA1-22099  
 anti mouse Cy3 conjugated: Jacson Immunoresearch 115-165-003  
 anti mouse/rabbit Alexa fluor 555: Thermofisher A-21424/A-21429  
 anti mouse/rabbit Alexa fluor 488: Themofisher A-21042/A-11008

### Validation

Integrin a5: Knockout validated by the manufacturer  
 active YAP: Knockout validated by the manufacturer

## Eukaryotic cell lines

---

Policy information about [cell lines](#)

Cell line source(s)

Riken BRC Cell Bank, Japan

Authentication

Cells were authenticated in this publication Reznikoff, C A, Brankow, D W, Heidelberger C Establishment and characterization of a cloned line of C3H mouse embryo cells sensitive to postconfluence inhibition of division. Cancer Res 1973 33:3231-8 PubMed ID: 4357355

Mycoplasma contamination

Cell lines were not tested for mycoplasma contamination

Commonly misidentified lines  
(See [ICLAC](#) register)

None were used
